# Supplementary material for: Direct determination of cadmium in rice flour by laser ablation-ICP-MSElectronic supplementary information (ESI) available: table of Cd concentrations in Japanese rice; plots showing the pre-ablation effect on 13C and 111Cd signal intensities and the spot-size effect on 111Cd signal intensities in NIES 10b; calibration plots. See http://www.rsc.org/suppdata/ja/b3/b310827a/
Source: Royal Society of Chemistry journal article supplement (doi:10.1039/b310827a), 2003-01-01
Supplement: figd.pdf [file figd.pdf]

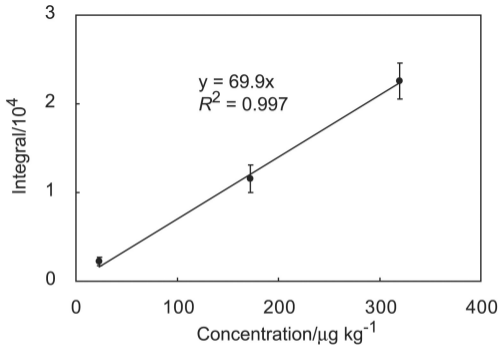

**Fig. D** Calibration line of integral intensity for  $^{111}\text{Cd}$  using the selected reference materials in the sub  $\text{mg kg}^{-1}$  range. The error bars represent the standard deviation of 6 measurements.
