# Supplementary material for: Direct determination of cadmium in rice flour by laser ablation-ICP-MSElectronic supplementary information (ESI) available: table of Cd concentrations in Japanese rice; plots showing the pre-ablation effect on 13C and 111Cd signal intensities and the spot-size effect on 111Cd signal intensities in NIES 10b; calibration plots. See http://www.rsc.org/suppdata/ja/b3/b310827a/
Source: Royal Society of Chemistry journal article supplement (doi:10.1039/b310827a), 2003-01-01
Supplement: fige.pdf [file fige.pdf]

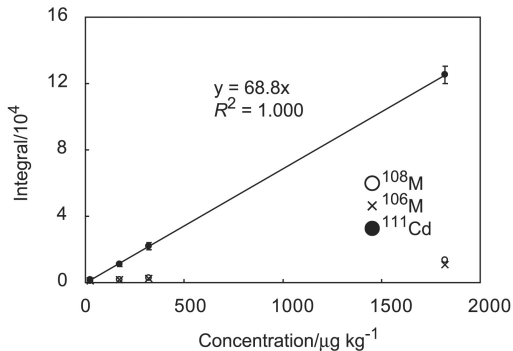

**Fig. E** Calibration line of integral intensity for <sup>111</sup>Cd after the correction of MoO interferences. The error bars represent the standard deviation of 6 measurements. <sup>108</sup>M and <sup>106</sup>M are integral intensities at  $m/z$  108 and 106, respectively.
