# Supplementary material for: Direct determination of cadmium in rice flour by laser ablation-ICP-MSElectronic supplementary information (ESI) available: table of Cd concentrations in Japanese rice; plots showing the pre-ablation effect on 13C and 111Cd signal intensities and the spot-size effect on 111Cd signal intensities in NIES 10b; calibration plots. See http://www.rsc.org/suppdata/ja/b3/b310827a/
Source: Royal Society of Chemistry journal article supplement (doi:10.1039/b310827a), 2003-01-01
Supplement: figg.pdf [file figg.pdf]

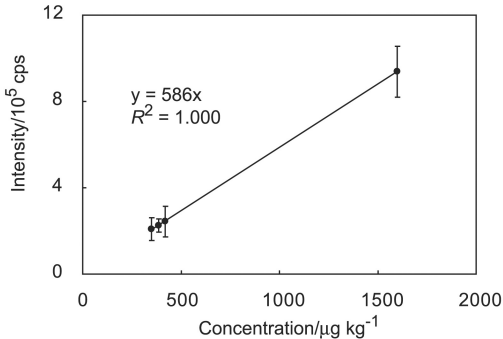

**Fig. G** Calibration line of signal intensity for <sup>98</sup>Mo using the selected reference materials. The error bars represent the standard deviation of 6 measurements. Using this calibration line, Mo in NIST 1568a was calculated to be 1.44 mg kg<sup>-1</sup>, which was 99% of the certified value.
