# Supplementary material for: Direct determination of cadmium in rice flour by laser ablation-ICP-MSElectronic supplementary information (ESI) available: table of Cd concentrations in Japanese rice; plots showing the pre-ablation effect on 13C and 111Cd signal intensities and the spot-size effect on 111Cd signal intensities in NIES 10b; calibration plots. See http://www.rsc.org/suppdata/ja/b3/b310827a/
Source: Royal Society of Chemistry journal article supplement (doi:10.1039/b310827a), 2003-01-01
Supplement: tablea.pdf [file tablea.pdf]

**Table A.** Cd concentration in Japanese rice

| Cd concentration (C)/mg kg <sup>-1</sup> | Number of samples |
|------------------------------------------|-------------------|
| $C < 0.01$                               | 3113              |
| $0.01 < C \leq 0.1$                      | 27839             |
| $0.10 < C \leq 0.20$                     | 5057              |
| $0.20 < C \leq 0.30$                     | 946               |
| $0.30 < C \leq 0.40$                     | 201               |
| $0.40 < C \leq 0.50$                     | 55                |
| $0.50 < C$                               | 39                |
|                                          | Total 37250       |
