# Supplementary figures and images for: Direct determination of cadmium in rice flour by laser ablation-ICP-MSElectronic supplementary information (ESI) available: table of Cd concentrations in Japanese rice; plots showing the pre-ablation effect on 13C and 111Cd signal intensities and the spot-size effect on 111Cd signal intensities in NIES 10b; calibration plots. See http://www.rsc.org/suppdata/ja/b3/b310827a/
Source: Royal Society of Chemistry journal article supplement (doi:10.1039/b310827a), 2003-01-01

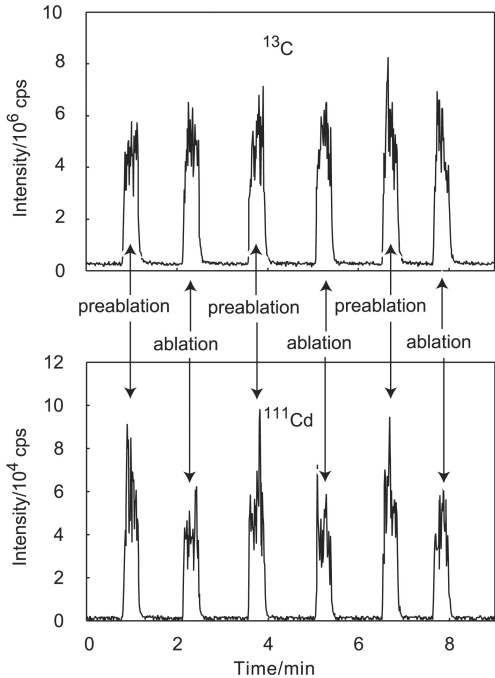

**Fig A.** Pre-ablation effect on  $^{13}\text{C}$  and  $^{111}\text{Cd}$  signal intensities in NIES 10b.

Supplement: figa.pdf [file figa.pdf]

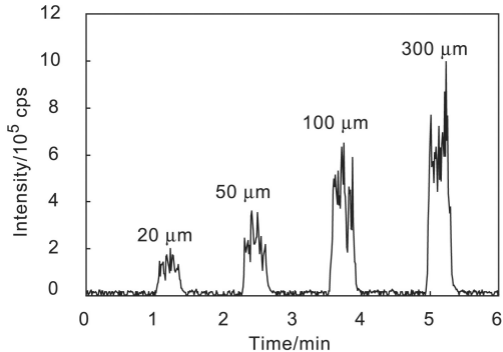

**Fig B.** Spot size effect on  $^{111}\text{Cd}$  signal intensities in NIES 10b.

Supplement: figb.pdf [file figb.pdf]
